# Supplementary material for: LncRNA RP11-670E13.6, interacted with hnRNPH, delays cellular senescence by sponging microRNA-663a in UVB damaged dermal fibroblasts
Source: PubMed Central journal article supplement (PMC6738423; doi:10.18632/aging.102159), 2019-08-23
Supplement: aging-11-102159-s003.pdf [file aging-11-102159-s003.pdf]

SUPPLEMENTARY FIGURES

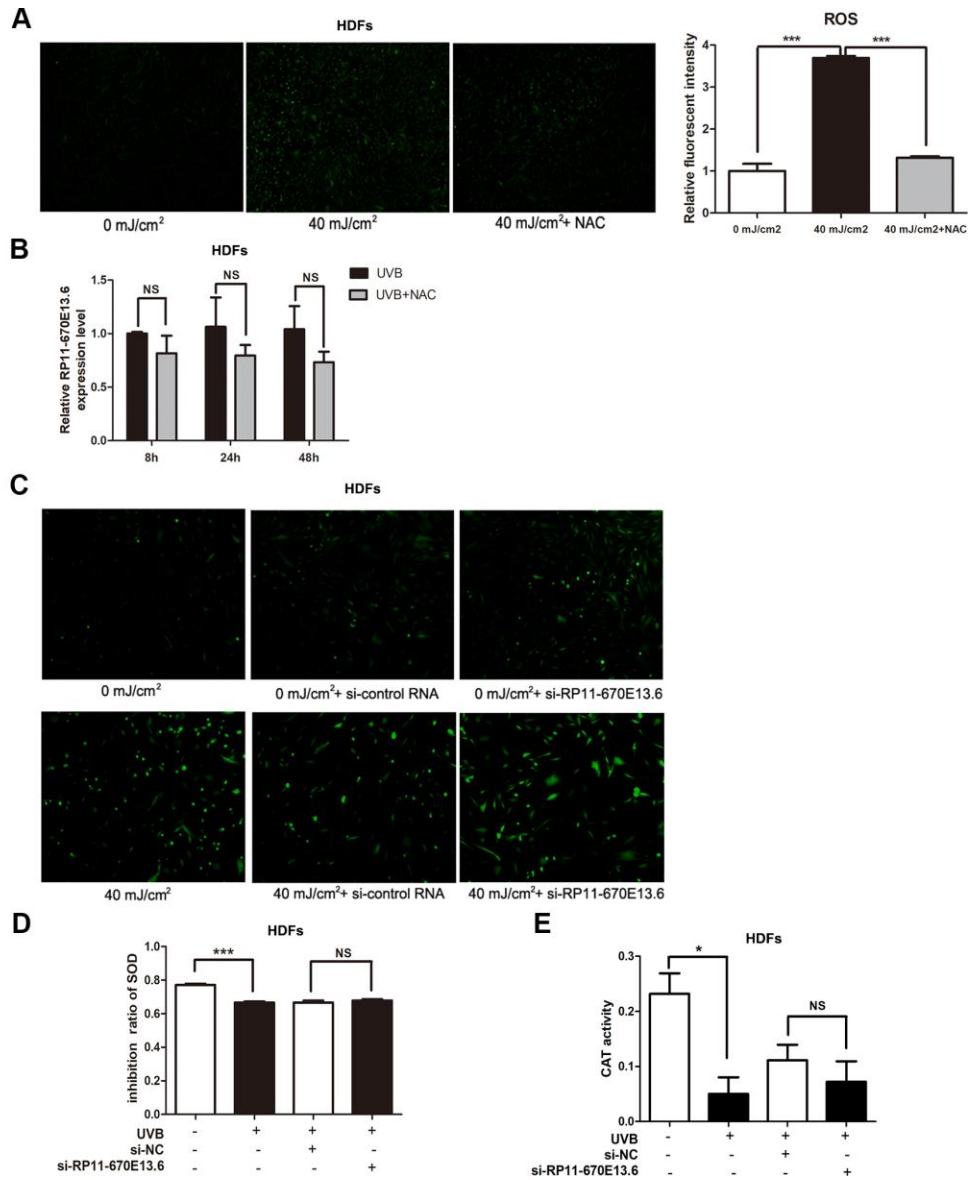

**Supplementary Figure 1.** (A) 24 h after exposure to 40 mJ/cm<sup>2</sup> UVB, ROS content (magnification, 40×) in the UVB irradiation group was increased compared with that in the control group, and NAC (10 mM) caused a reduction in UVB-induced ROS generation. (B) At 24 h after exposure to 40 mJ/cm<sup>2</sup> UVB, NAC had no significant effect on UVB-induced upregulation of *RP11-670E13.6*. (C) ROS contents were not influenced in *RP11-670E13.6*-depleted HDFs compared with that in the control group (magnification, 40×). (D, E) Activities of antioxidant enzymes SOD and CAT. CAT, catalase; NS, not significant; SOD, superoxide dismutase.

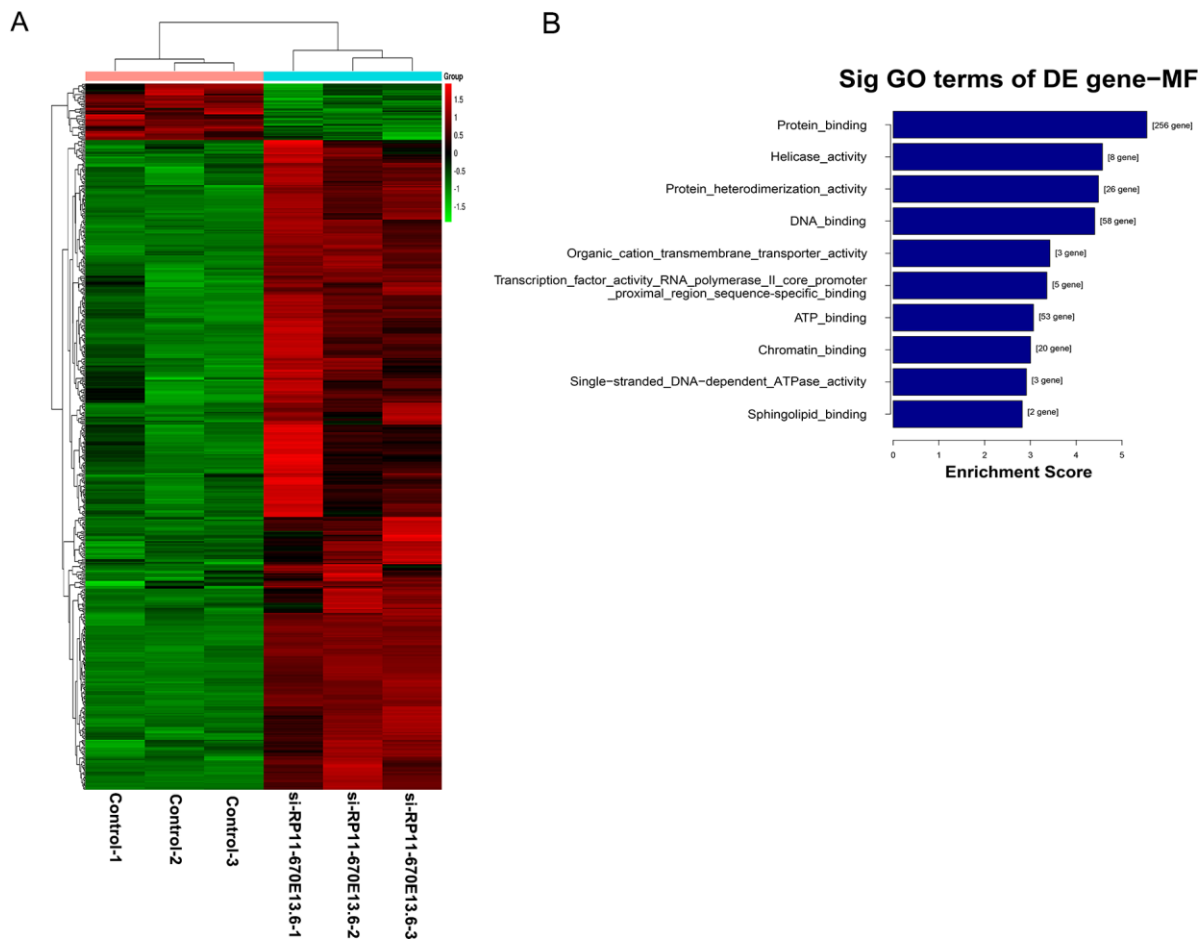

**Supplementary Figure 2.** (A) HDFs were transfected with *RP11-670E13.6* or control siRNA. Forty-eight hours after transfection, whole-transcriptome analysis was performed with RNA-seq. Heatmap showing the differentially expressed genes after *RP11-670E13.6* knockdown ( $P < 0.05$ , FC  $\log_2 > 1.5$ ). (B) Top significant molecular functions for genes whose transcript levels were increased in *RP11-670E13.6*-depleted HDFs.

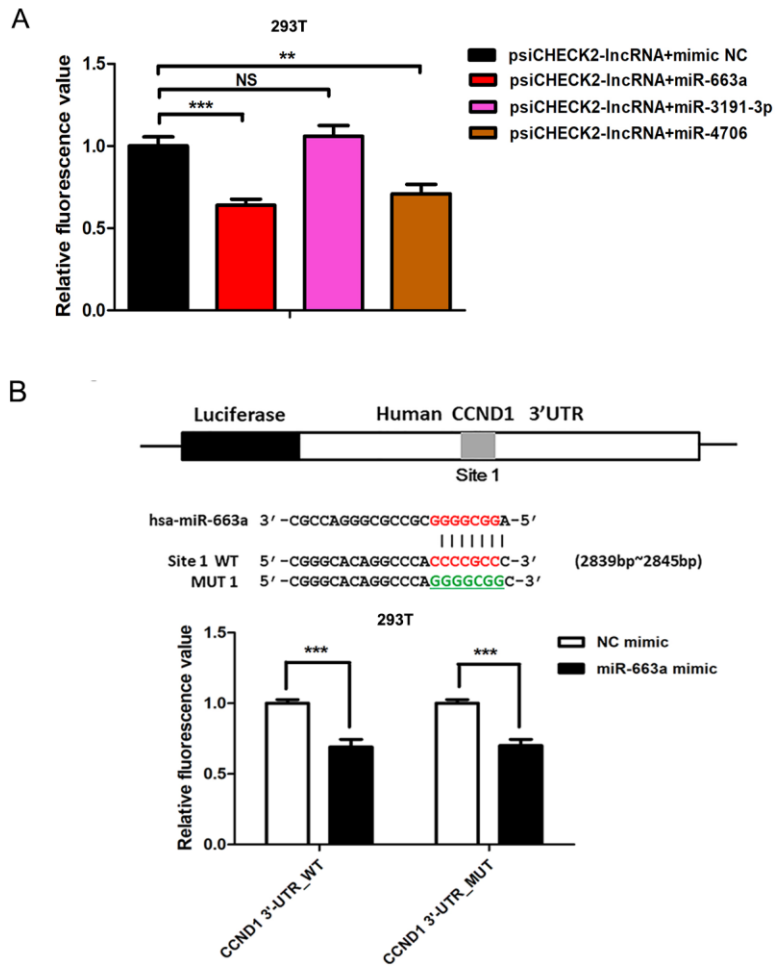

**Supplementary Figure 3.** (A) Luciferase assays showed a significant decrease in luciferase activities after cotransfection of the *RP11-670E13.6* expression vector and miRNA mimics. (B) Putative binding site of *miR-663a* in the 3'-UTR of *CCND1* and the sites of target mutagenesis are indicated. Luciferase activity in HDFs, demonstrating the effects of *miR-663a* on the expression of *CCND1*. *P* values were determined by Student's *t*-tests. \**P* < 0.05; \*\**P* < 0.01; and \*\*\**P* < 0.001.
